# Supplementary material
Source: PubMed Central journal article supplement (PMC1820827)
Supplement: pbio.0050039.sg005.pdf [file pbio.0050039.sg005.pdf]

**A Open field**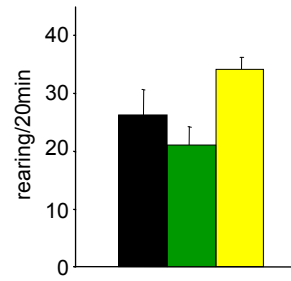**B Forced swimming**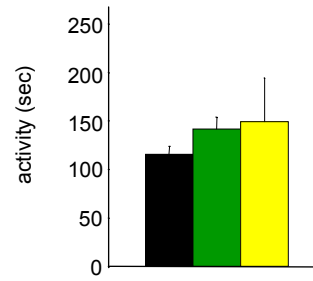**C Swimming tank**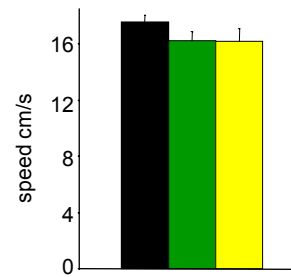**D Rotarod**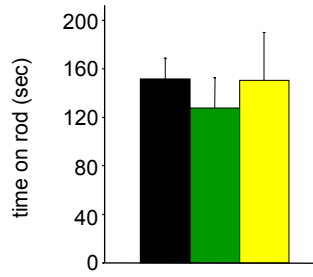

■ *Ret<sup>flx/flx</sup>/Ret<sup>flx/-</sup>*  
■ *DAT-Ret<sup>flx/+</sup>/DAT-TrkB<sup>flx/+</sup>*  
■ *DAT-Ret<sup>flx/flx</sup>*
