# Supplementary material
Source: PubMed Central journal article supplement (PMC1820827)

**A**

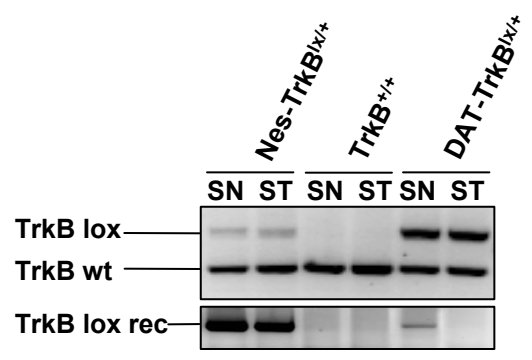

**B**

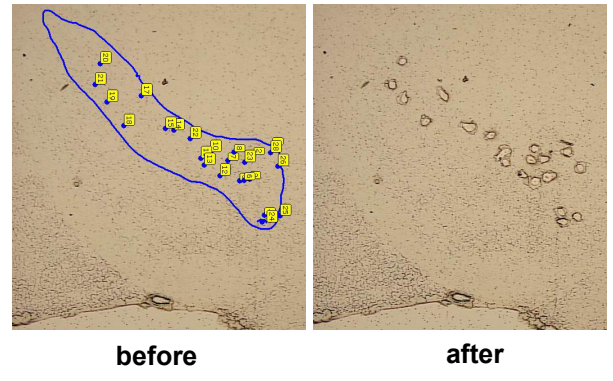

**C**

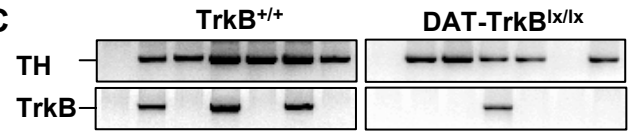

**D**

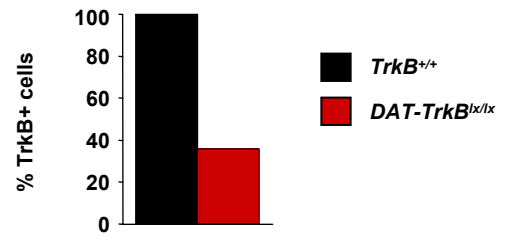

Supplement: pbio.0050039.sg001.pdf [file pbio.0050039.sg001.pdf]

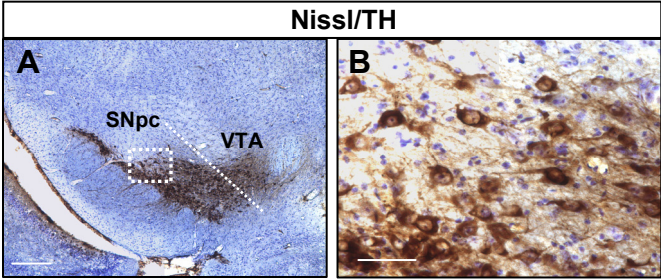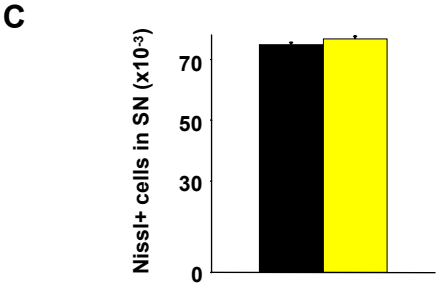

Supplement: pbio.0050039.sg002.pdf [file pbio.0050039.sg002.pdf]

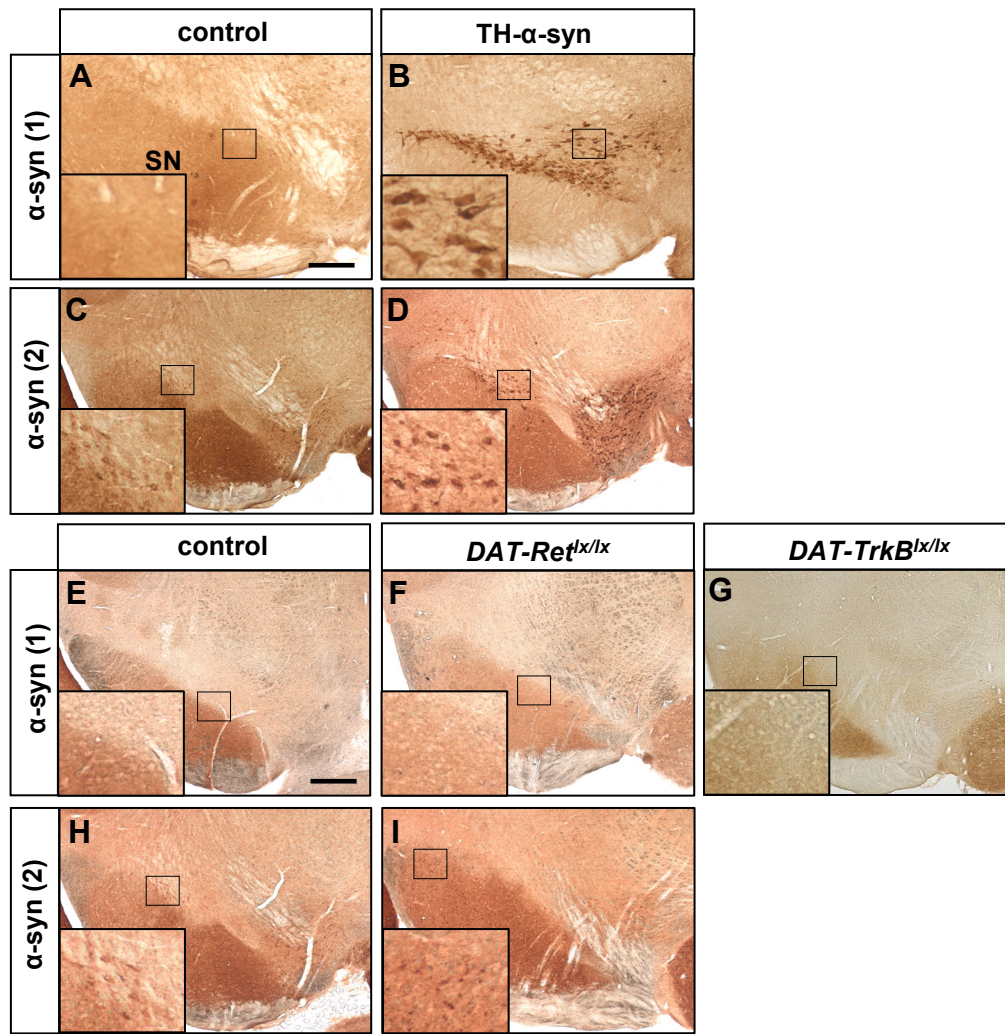

Supplement: pbio.0050039.sg003.pdf [file pbio.0050039.sg003.pdf]

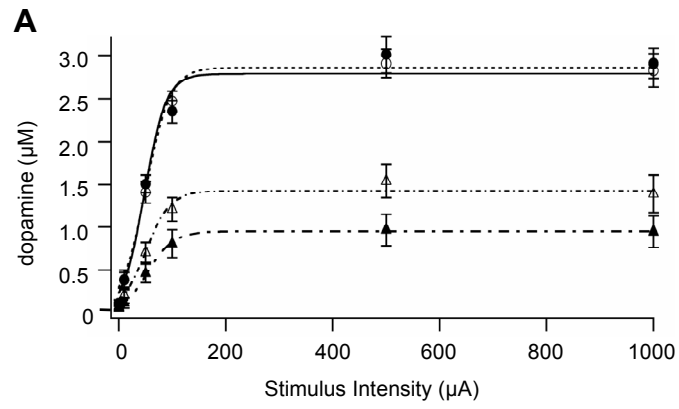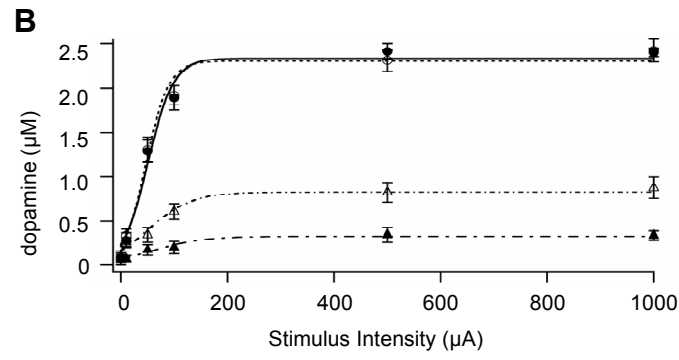

- Ret<sup>+/+</sup>
- Ret<sup>+/-</sup>
- △ DAT-Ret<sup>+/+</sup>
- ▲ DAT-Ret<sup>+/+</sup>

Supplement: pbio.0050039.sg004.pdf [file pbio.0050039.sg004.pdf]
